# Supplementary material for: Canine respiratory coronavirus employs caveolin-1-mediated pathway for internalization to HRT-18G cells
Source: PubMed Central journal article supplement (PMC6029178; doi:10.1186/s13567-018-0551-9), 2018-07-03

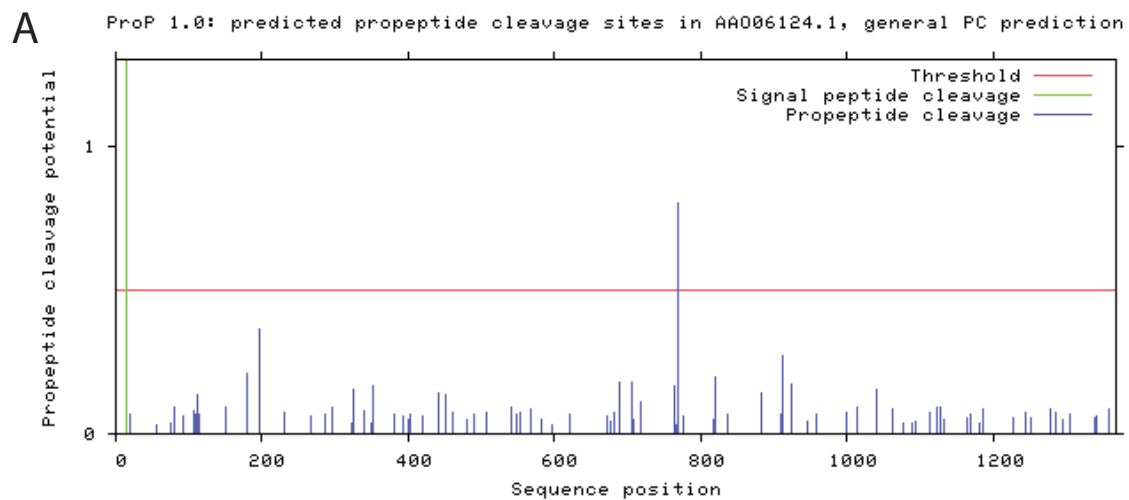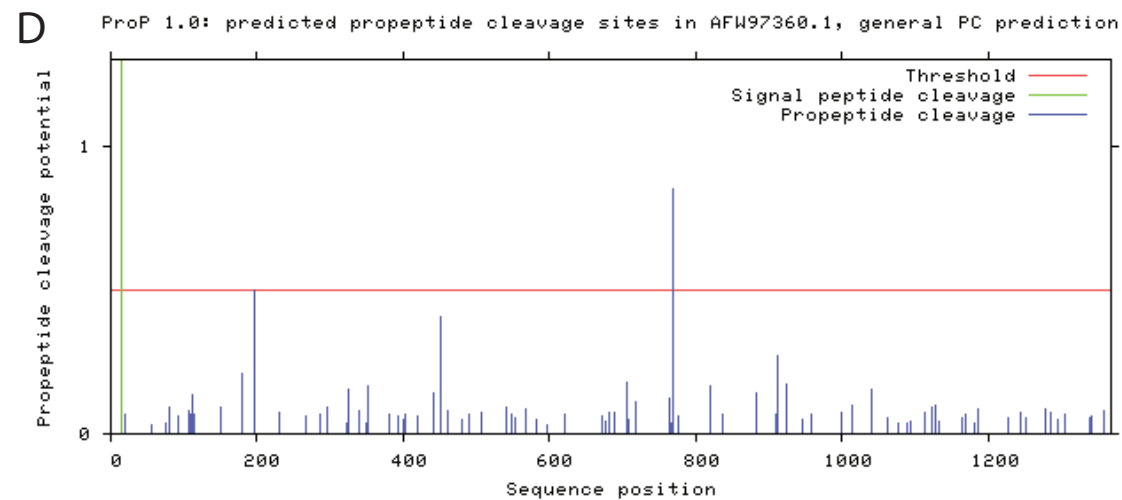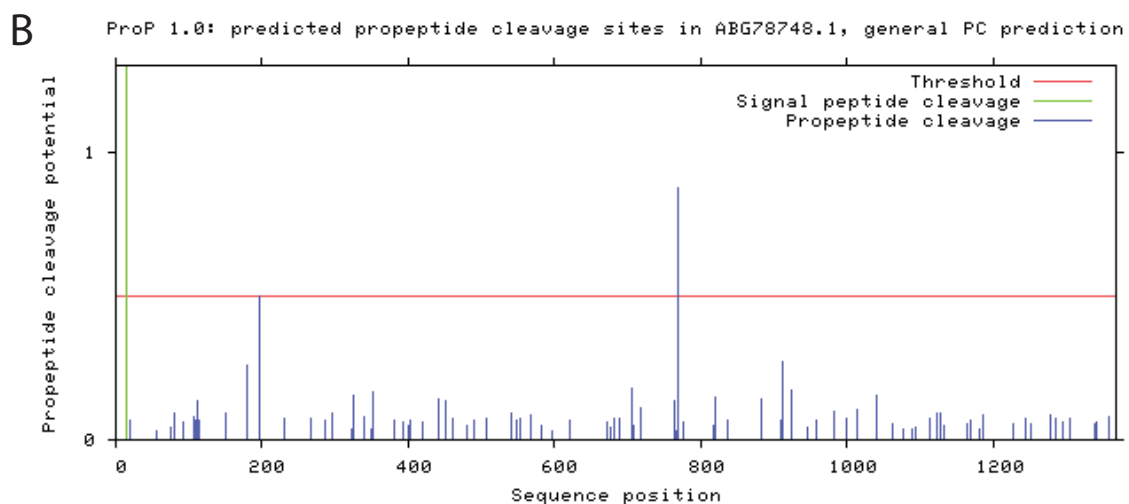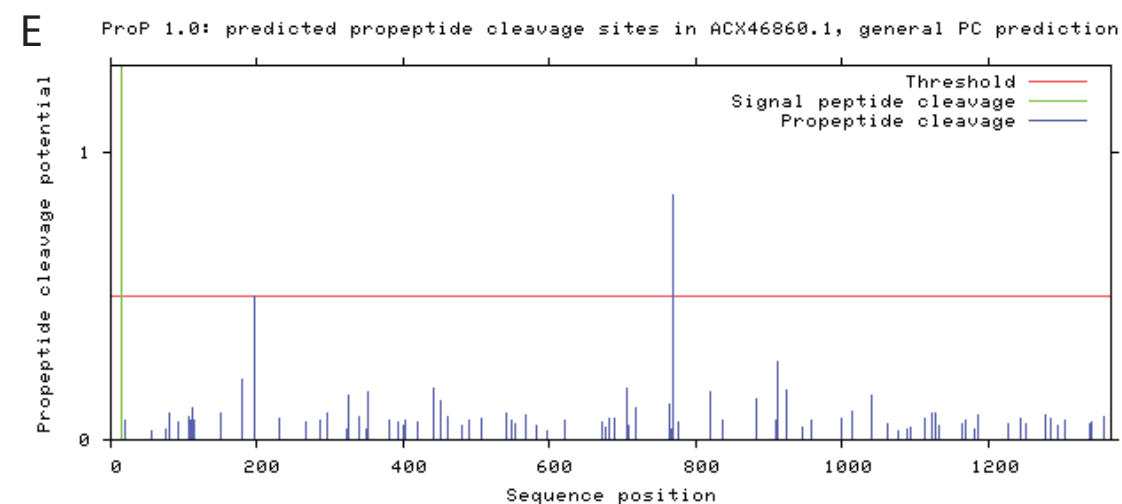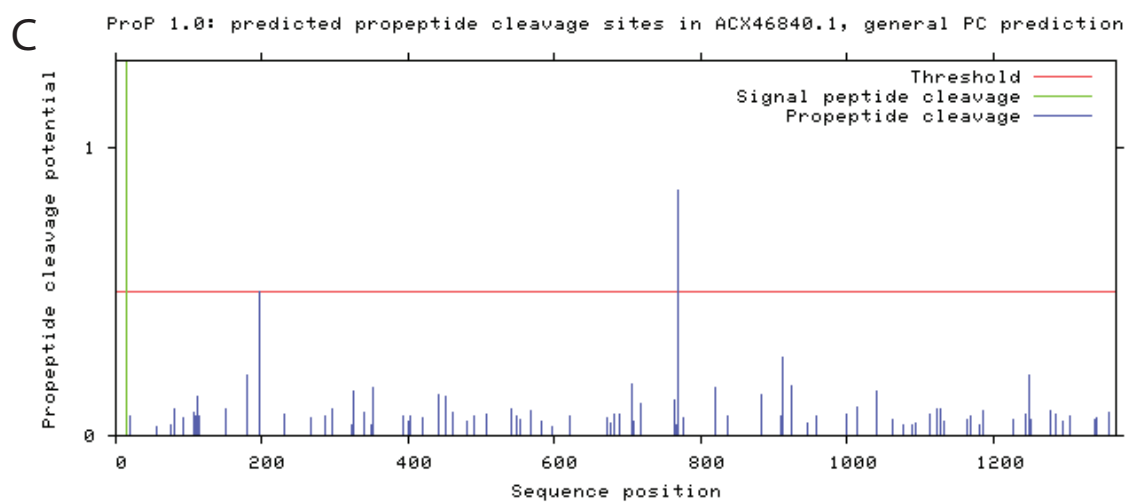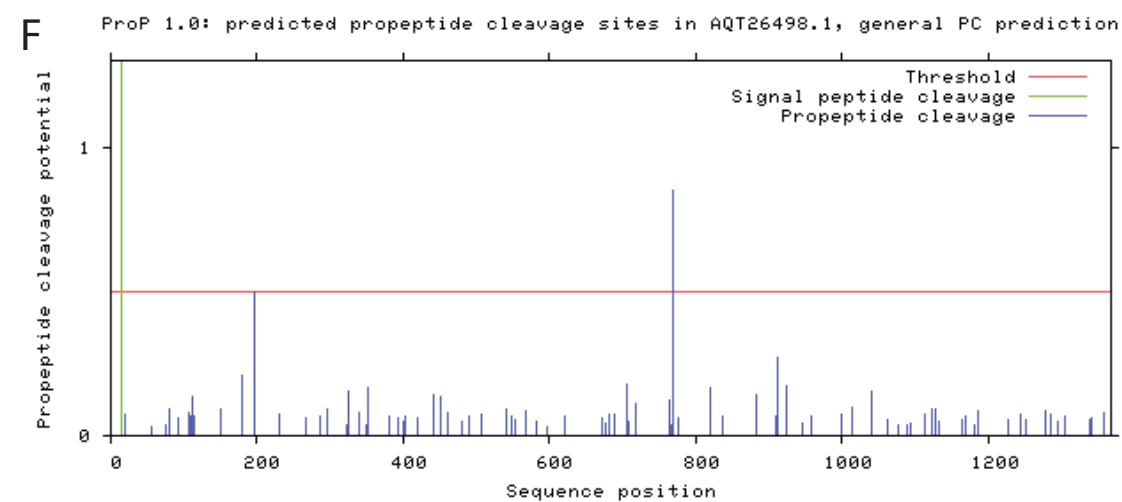

Supplement: 13567_2018_551_MOESM5_ESM.pdf [file 13567_2018_551_MOESM5_ESM.pdf]
